# Supplementary material for: TMS-evoked responses are driven by recurrent large-scale network dynamics
Source: eLife. 2023 Apr 21;12:e83232. doi: 10.7554/eLife.83232 (PMC10121222; doi:10.7554/eLife.83232)
Supplement: Supplementary file 1. [file elife-83232-supp1.csv]

	a				b				c1				c2				c3				c4				g				k				mu
	prior mean	mean	prior variance	variance	prior mean	mean	prior variance	variance	prior mean	mean	prior variance	variance	prior mean	mean	prior variance	variance	prior mean	mean	prior variance	variance	prior mean	mean	prior variance	variance	prior mean	mean	prior variance	variance	prior mean	mean	prior variance	variance	prior mean	mean	prior variance	variance
subj 1	100	99.35	0.5	13.42	50	51.73	1	20.23	135	134.25	0.2	15.18	108	109.36	0.4	16.22	33.75	30.86	0.8	20.14	33.75	31.84	0.8	19.52	1000	1010.79	0.1	0	5	8.62	0.3	15.83	0.5	0.72	2.5	26.81
subj 2	100	97.9	0.5	17.28	50	50.92	1	21.42	135	132.44	0.2	3.65	108	109.31	0.4	16.35	33.75	31.67	0.8	19.1	33.75	32.31	0.8	20.25	1000	995.46	0.1	1.67	5	8.49	0.3	14.09	0.5	1.26	2.5	26.73
subj 3	100	96.16	0.5	17.79	50	48.93	1	19.24	135	132.07	0.2	3.48	108	109.95	0.4	7.66	33.75	31.92	0.8	8.06	33.75	33.16	0.8	21.41	1000	1006.7	0.1	0	5	5.21	0.3	15.58	0.5	0.88	2.5	27.59
subj 4	100	97.96	0.5	18.69	50	49.43	1	19.97	135	140.5	0.2	2.01	108	110.17	0.4	16.05	33.75	27.85	0.8	19.08	33.75	31.2	0.8	19.5	1000	1001.79	0.1	12.22	5	7.37	0.3	15	0.5	1.15	2.5	26.32
subj 5	100	97.75	0.5	17.3	50	49.75	1	20.38	135	136.68	0.2	18.85	108	110.33	0.4	7.65	33.75	31.62	0.8	19.46	33.75	33.61	0.8	18.12	1000	1000.93	0.1	12.9	5	8.24	0.3	3.48	0.5	1.03	2.5	26.11
subj 6	100	98.54	0.5	18.53	50	48.45	1	20.71	135	139.35	0.2	2.39	108	109.39	0.4	16.02	33.75	32.23	0.8	13.27	33.75	32.59	0.8	19.85	1000	999.16	0.1	13.23	5	7.36	0.3	17.53	0.5	1.13	2.5	26.27
subj 7	100	98.82	0.5	13.83	50	50.46	1	20.58	135	137.48	0.2	13.29	108	110.16	0.4	11.6	33.75	31.33	0.8	18.52	33.75	30.71	0.8	19.16	1000	1000.65	0.1	11.53	5	8.87	0.3	11.01	0.5	1.06	2.5	26.13
subj 8	100	92.84	0.5	16.87	50	51	1	20.27	135	132.83	0.2	3.33	108	110.37	0.4	13.65	33.75	30.34	0.8	20.5	33.75	32.8	0.8	18.19	1000	999.25	0.1	12.55	5	10.27	0.3	4.46	0.5	0.89	2.5	26.21
subj 9	100	100.49	0.5	18.99	50	50.53	1	20.41	135	135.59	0.2	13.75	108	108.55	0.4	16.85	33.75	32.77	0.8	16.79	33.75	33.59	0.8	19.59	1000	1000.82	0.1	12.46	5	5.85	0.3	17.42	0.5	1.33	2.5	26.57
subj 10	100	101.71	0.5	6.21	50	50.14	1	20.23	135	132.57	0.2	4.58	108	106.91	0.4	13.48	33.75	32.87	0.8	19.08	33.75	32.86	0.8	19.36	1000	986.26	0.1	0	5	8.68	0.3	4.63	0.5	1.09	2.5	26.18
subj 11	100	99.29	0.5	16.84	50	50.64	1	19.5	135	133.83	0.2	9.78	108	109.23	0.4	19.78	33.75	30.79	0.8	19.06	33.75	34.11	0.8	15.93	1000	998.93	0.1	14.92	5	5.53	0.3	14.75	0.5	1.09	2.5	26.17
subj 12	100	97.39	0.5	7.43	50	49.64	1	20.25	135	131.9	0.2	2.89	108	108.64	0.4	16.16	33.75	31.61	0.8	19.33	33.75	34.84	0.8	10.35	1000	1003.16	0.1	2.54	5	7.62	0.3	16.61	0.5	0.62	2.5	26.11
subj 13	100	99.14	0.5	16.26	50	48.37	1	21.2	135	131.54	0.2	2.6	108	109.54	0.4	13.97	33.75	32.12	0.8	18.11	33.75	33.7	0.8	20.52	1000	997.88	0.1	7.65	5	6.73	0.3	3.97	0.5	0.83	2.5	26.39
subj 14	100	99.84	0.5	17.68	50	49.56	1	20.23	135	138.69	0.2	2.81	108	108.87	0.4	17.16	33.75	32.58	0.8	19.58	33.75	32.93	0.8	19.2	1000	1014.76	0.1	0	5	4.5	0.3	10.2	0.5	1.01	2.5	26.11
subj 15	100	96.39	0.5	19.56	50	48.72	1	20.22	135	137.18	0.2	17.59	108	109.07	0.4	17.2	33.75	32.91	0.8	17.99	33.75	30.56	0.8	19.11	1000	1003.67	0.1	2.07	5	6.71	0.3	15.26	0.5	0.84	2.5	26.33
subj 16	100	98.03	0.5	19.01	50	49.13	1	17.83	135	136.29	0.2	16.78	108	109.28	0.4	12.55	33.75	35.04	0.8	13.89	33.75	33.27	0.8	19.11	1000	997.82	0.1	6.72	5	5.89	0.3	14.88	0.5	0.89	2.5	26.2
subj 17	100	94.77	0.5	16.94	50	50.46	1	21.4	135	131.32	0.2	2.21	108	109.16	0.4	17.76	33.75	31.09	0.8	18.07	33.75	33	0.8	15.64	1000	1004.41	0.1	1.74	5	8.6	0.3	16.61	0.5	0.73	2.5	26.78
subj 18	100	95.35	0.5	19.59	50	50.06	1	20.4	135	134.15	0.2	12.04	108	109.63	0.4	16.12	33.75	27.02	0.8	19.07	33.75	30.96	0.8	20.49	1000	1004.85	0.1	1.55	5	16.62	0.3	14.8	0.5	1.24	2.5	26.65
subj 19	100	96.4	0.5	18.15	50	49.19	1	20.18	135	140.72	0.2	2.03	108	106.88	0.4	10.83	33.75	34.8	0.8	10.49	33.75	33.5	0.8	21.44	1000	1000.63	0.1	11.85	5	7.8	0.3	3.14	0.5	0.94	2.5	27.5
subj 20	100	97.53	0.5	19.36	50	49.93	1	21.33	135	135.03	0.2	16.03	108	110.1	0.4	8.05	33.75	31.67	0.8	20.58	33.75	32.88	0.8	21.06	1000	1001.63	0.1	12.29	5	6.92	0.3	16.01	0.5	0.77	2.5	27.98
